# Supplementary material for: Human Serum PCSK9 Is Elevated at Parturition in Comparison to Nonpregnant Subjects While Serum PCSK9 from Umbilical Cord Blood is Lower Compared to Maternal Blood
Source: PubMed Central journal article supplement (PMC3687493; doi:10.1155/2013/341632), 2013-06-05
Supplement: 341632.f1.pdf [file 341632.f1.pdf]

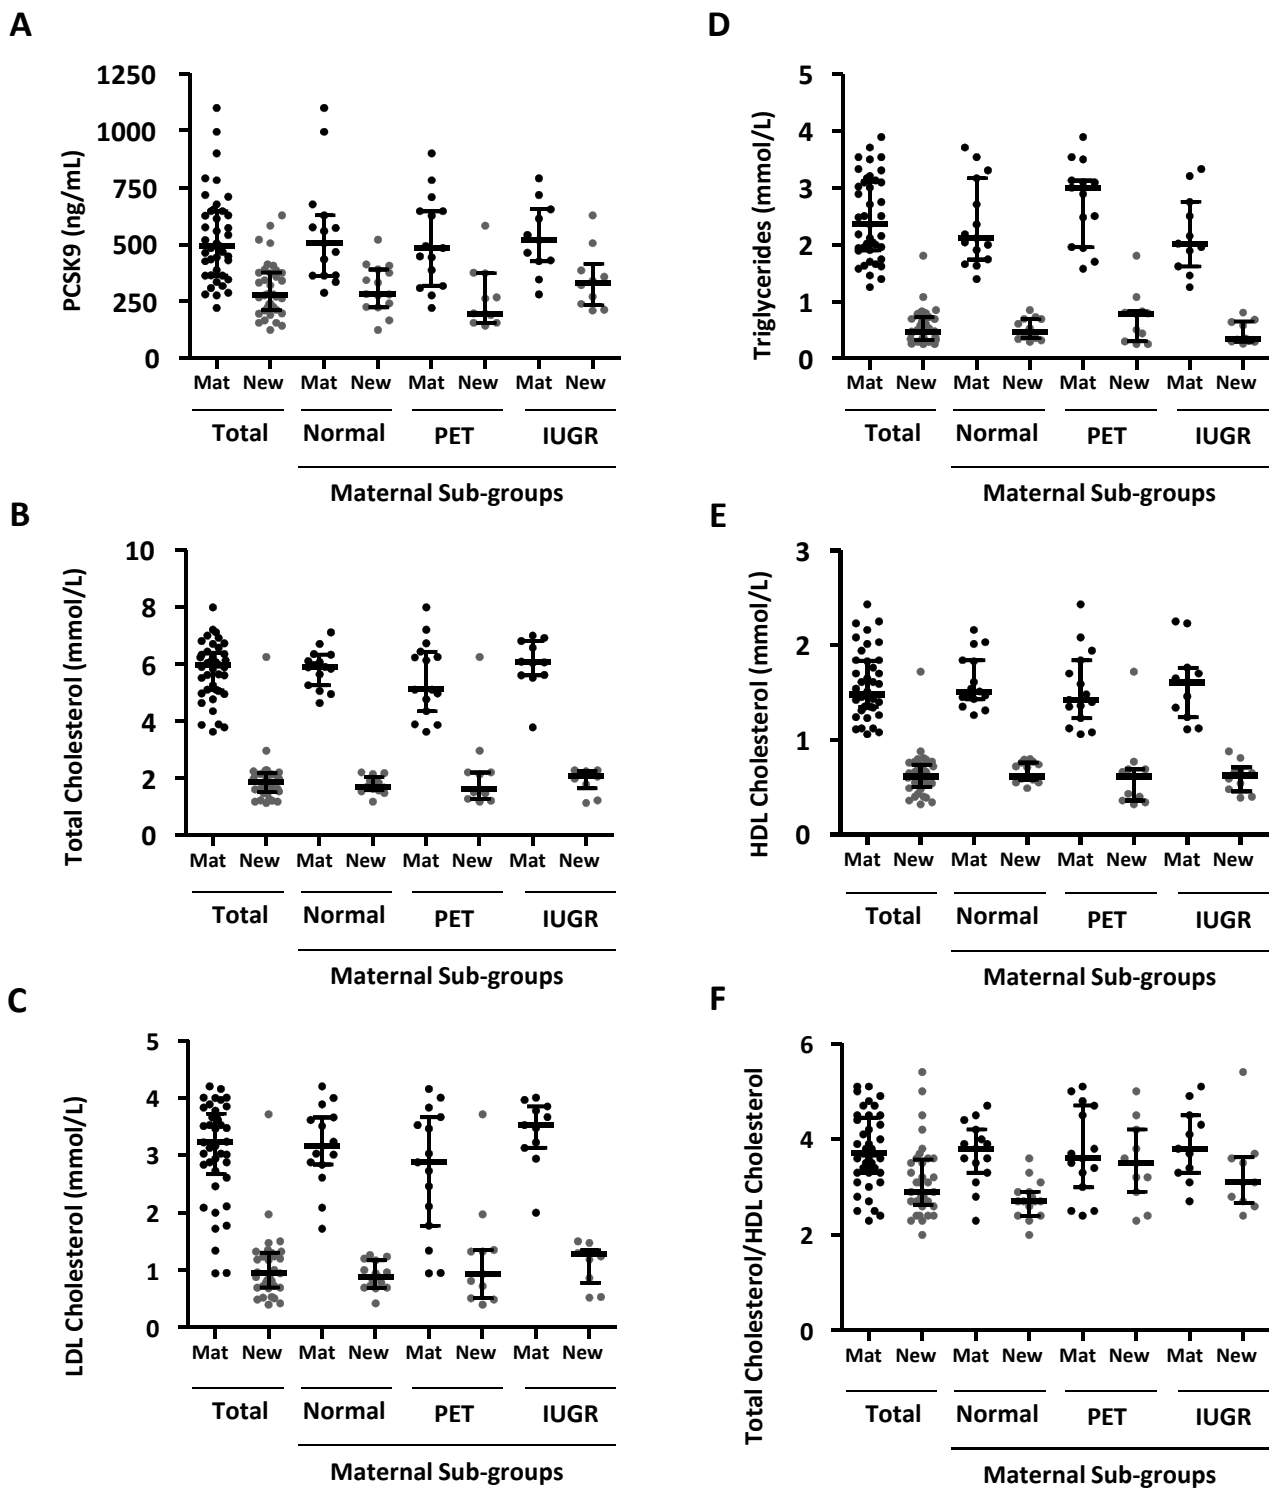

Supplemental Figure 1
